# Supplementary material
Source: PubMed Central journal article supplement (PMC9625833)
Supplement: NIHMS1845886-supplement-supp2.pdf [file NIHMS1845886-supplement-supp2.pdf]

**Geriatrics Home Visit Evaluation**

Today's Date: \_\_\_\_\_

Your professional school: Dental

Medical

Gender \_\_\_\_\_

Please list two new things you learned today:

| Self assessment: please rate each item                                                        | Strongly agree | Agree | Neutral | Disagree | Strongly disagree | Comments |
|-----------------------------------------------------------------------------------------------|----------------|-------|---------|----------|-------------------|----------|
| I feel comfortable assessing functional status in older adults                                |                |       |         |          |                   |          |
| I feel comfortable evaluating for home safety in older adults                                 |                |       |         |          |                   |          |
| I feel comfortable performing a fall risk assessment in older adults                          |                |       |         |          |                   |          |
| I feel comfortable assessing cognitive function in older adults                               |                |       |         |          |                   |          |
| I feel comfortable differentiating among types of health care proxies, and advance directives |                |       |         |          |                   |          |
| This session has increased my interest in the field of geriatrics                             |                |       |         |          |                   |          |
